# Supplementary material for: Competitive Androgen Receptor Antagonism as a Factor Determining the Predictability of Cumulative Antiandrogenic Effects of Widely Used Pesticides
Source: PubMed Central journal article supplement (PMC3556629; doi:10.1289/ehp.1205391), 2012-09-10
Supplement: ehp.1205391.s001.pdf [file ehp.1205391.s001.pdf]

## Supplemental Material

### Competitive Androgen Receptor Antagonism as a Factor Determining the Predictability of Cumulative Antiandrogenic Effects of Widely Used Pesticides

Frances Orton, Erika Rosivatz, Martin Scholze and Andreas Kortenkamp

#### Contents

|                                                                               |        |
|-------------------------------------------------------------------------------|--------|
| Table S1, components of test mixtures                                         | Page 2 |
| Table S2, antiandrogenic activity, androgenicity and cytotoxicity of mixtures | Page 3 |
| Figure S1, flutamide Schild regression plot                                   | Page 4 |
| Figure S2, cytotoxicity and androgenicity of mixtures                         | Page 5 |

*Supplemental Material, Table S1: Test mixtures*

| <b>Component<br/>(by order of IC10)</b> | Relative proportions (percentages) |        |                            |        |                          |        |        |        |
|-----------------------------------------|------------------------------------|--------|----------------------------|--------|--------------------------|--------|--------|--------|
|                                         | Mixture of eight pesticides        |        | Mixture of five pesticides |        | Mixture of 13 pesticides |        |        |        |
|                                         | IC01                               | IC10   | IC01                       | IC10   | IC01                     | IC10   | IC20   | IC50   |
| Vinclozolin                             | -                                  | -      | 0.12%                      | 0.26%  | 0.08%                    | 0.18%  | 0.21%  | 0.23%  |
| Dimethomorph                            | 1.22%                              | 1.07%  | -                          | -      | 0.40%                    | 0.34%  | 0.34%  | 0.37%  |
| Fludioxonil                             | 3.13%                              | 3.08%  | -                          | -      | 1.02%                    | 1.01%  | 1.04%  | 1.17%  |
| Fenhexamid                              | 1.67%                              | 6.15%  | -                          | -      | 0.54%                    | 1.92%  | 2.53%  | 3.07%  |
| Linuron                                 | -                                  | -      | 2.62%                      | 2.81%  | 1.82%                    | 1.92%  | 2.10%  | 2.78%  |
| Tebuconazole                            | 13.32%                             | 11.88% | -                          | -      | 4.35%                    | 3.77%  | 3.67%  | 3.55%  |
| Imazalil                                | 5.91%                              | 11.91% | -                          | -      | 1.93%                    | 3.76%  | 4.07%  | 3.61%  |
| Phenylphenol                            | 6.66%                              | 12.69% | -                          | -      | 2.17%                    | 3.98%  | 4.31%  | 4.14%  |
| Pirimphos-methyl                        | 21.79%                             | 21.26% | -                          | -      | 7.11%                    | 7.01%  | 7.23%  | 7.76%  |
| Methiocarb                              | 46.31%                             | 31.96% | -                          | -      | 15.11%                   | 9.93%  | 8.48%  | 6.34%  |
| Chlorpropham                            | -                                  | -      | 24.68%                     | 16.79% | 17.16%                   | 11.46% | 10.06% | 8.75%  |
| Cyprodinil                              | -                                  | -      | 36.50%                     | 33.08% | 25.39%                   | 22.59% | 19.15% | 12.26% |
| Pyrimethanil                            | -                                  | -      | 36.08%                     | 47.06% | 25.10%                   | 32.13% | 36.82% | 45.97% |

Rounded values given for relative proportions

*Supplemental Material, Table S2 – Receptor-mediated antiandrogenic activity, androgenicity and cytotoxicity of individual compounds and mixtures in the MDA-kb2*

| Substance<br>(by order of IC10)                 | Concentration Response Function |                  |                  |                       |                 | Anti-androgenicity          | Androgen                    | Cytotoxicity |         |
|-------------------------------------------------|---------------------------------|------------------|------------------|-----------------------|-----------------|-----------------------------|-----------------------------|--------------|---------|
|                                                 | RM                              | $\hat{\theta}_1$ | $\hat{\theta}_2$ | $\hat{\theta}_{\min}$ | $\theta_{\max}$ | IC10 (M), [CI]              | EC10 (M)                    | EC10 (M)     |         |
| Vinclozolin                                     | logit                           | -18.48           | -2.91            | 0.08                  | 1               | 8.51E-8 [6.89E-8 - 1.03E-7] | 1.70E-6                     | >5.0E-5      |         |
| Dimethomorph                                    | weibull                         | -10.09           | -1.61            | -0.04                 | 1               | 1.59E-7 [1.28E-7 - 1.99E-7] | negative                    | > 2.5E-5     |         |
| Fludioxonil                                     | weibull                         | -7.41            | -1.32            | -0.29                 | 1               | 4.61E-7 [3.43E-7 - 6.13E-7] | negative                    | 1.83E-5      |         |
| Fenhexamid                                      | logit                           | -11.31           | -2.28            | -0.28                 | 1               | 9.19E-7 [6.00E-7 - 1.36E-6] | negative                    | 1.30E-5      |         |
| Linuron                                         | weibull                         | -6.91            | -1.29            | -0.13                 | 1               | 9.53E-7 [6.21E-7 - 1.32E-6] | 1.58E-6                     | >5.0E-5      |         |
| Tebuconazole                                    | weibull                         | -7.50            | -1.47            | -0.34                 | 1               | 1.78E-6 [1.50E-6 - 2.06E-6] | negative                    | 3.13E-5      |         |
| Imazalil                                        | logit                           | -14.96           | -3.03            | -0.28                 | 1               | 1.78E-6 [1.44E-6 - 2.16E-6] | negative                    | 1.58E-5      |         |
| Phenylphenol                                    | logit                           | -15.99           | -3.17            | 0.03                  | 1               | 1.90E-6 [1.21E-6 - 2.52E-6] | negative                    | > 5.0E-5     |         |
| Pirimphos-methyl                                | weibull                         | -6.04            | -1.28            | -0.42                 | 1               | 3.18E-6 [2.26E-6 - 4.25E-6] | negative                    | >5.0E-5      |         |
| Methiocarb                                      | weibull                         | -10.22           | -2.09            | -0.23                 | 1               | 4.78E-6 [3.30E-6 - 5.45E-6] | negative                    | >4.6E-5      |         |
| Chlorpropham                                    | weibull                         | -10.83           | -2.21            | 0.05                  | 1               | 5.22E-6 [4.71E-6 - 6.04E-6] | 1.05E-6                     | >5.0E-5      |         |
| Cyprodinil                                      | logit                           | -24.90           | -5.43            | 0.08                  | 1               | 1.07E-5 [8.69E-6 - 1.74E-5] | 1.00E-6                     | >5.0E-5      |         |
| Pyrimethanil                                    | weibull                         | -3.67            | -0.98            | -0.76                 | 1               | 1.41E-5 [9.12E-6 - 2.18E-5] | 1.68E-5                     | >1.25E-4     |         |
| <i>Mixtures with ratio as defined in Tab.S1</i> |                                 |                  |                  |                       |                 |                             |                             |              |         |
| 8Mix :                                          | IC01                            | weibull          | -5.14            | -1.07                 | -0.75           | 1                           | 1.65E-6 [1.11E-6 - 2.21E-6] | negative     | 7.74E-5 |
|                                                 | IC10                            | weibull          | -6.23            | -1.23                 | -0.38           | 1                           | 1.49E-6 [1.23E-6 - 1.85E-6] | negative     | 6.08E-5 |
| 5Mix:                                           | IC01                            | weibull          | -8.69            | -1.93                 | -0.29           | 1                           | 1.03E-5 [8.25E-6 - 1.21E-5] | 7.35E-6      | 7.01E-5 |
|                                                 | IC10                            | weibull          | -6.95            | -1.57                 | -0.41           | 1                           | 8.97E-6 [6.77E-6 - 1.20E-5] | 1.32E-5      | 7.41E-5 |
| 13Mix:                                          | IC01                            | weibull          | -6.88            | -1.49                 | -0.28           | 1                           | 5.56E-6 [4.38E-6 - 7.39E-6] | 1.78E-6      | 7.50E-5 |
|                                                 | IC10                            | weibull          | -4.48            | -1.05                 | -0.95           | 1                           | 5.20E-6 [3.47E-6 - 7.28E-6] | 2.90E-6      | 6.25E-5 |
|                                                 | IC20                            | logit            | -10.81           | -2.40                 | -0.15           | 1                           | 3.25E-6 [2.28E-6 - 4.91E-6] | 6.25E-6      | 7.50E-5 |
|                                                 | IC50                            | logit            | -11.77           | -2.68                 | -0.16           | 1                           | 5.41E-6 [3.70E-6 - 7.44E-6] | 1.56E-5      | 8.13E-5 |

IC10: concentration that inhibits the androgenicity of 0.25 nM DHT by 10%; EC10: concentration that produces a 10% effect. Values in brackets denote the upper and lower limits of the approximate 95% confidence interval; the column “RM” indicates the mathematical regression function as defined at Scholze *et al.* (2001):  $\hat{\theta}_1, \hat{\theta}_2, \hat{\theta}_{\min}$  estimated model parameters, given for concentrations expressed in M (rounded values),  $\theta_{\max}$  were not estimated, but set to 1 relating to the mean value of the DHT controls (individual data first reported in Orton *et al.* 2011)

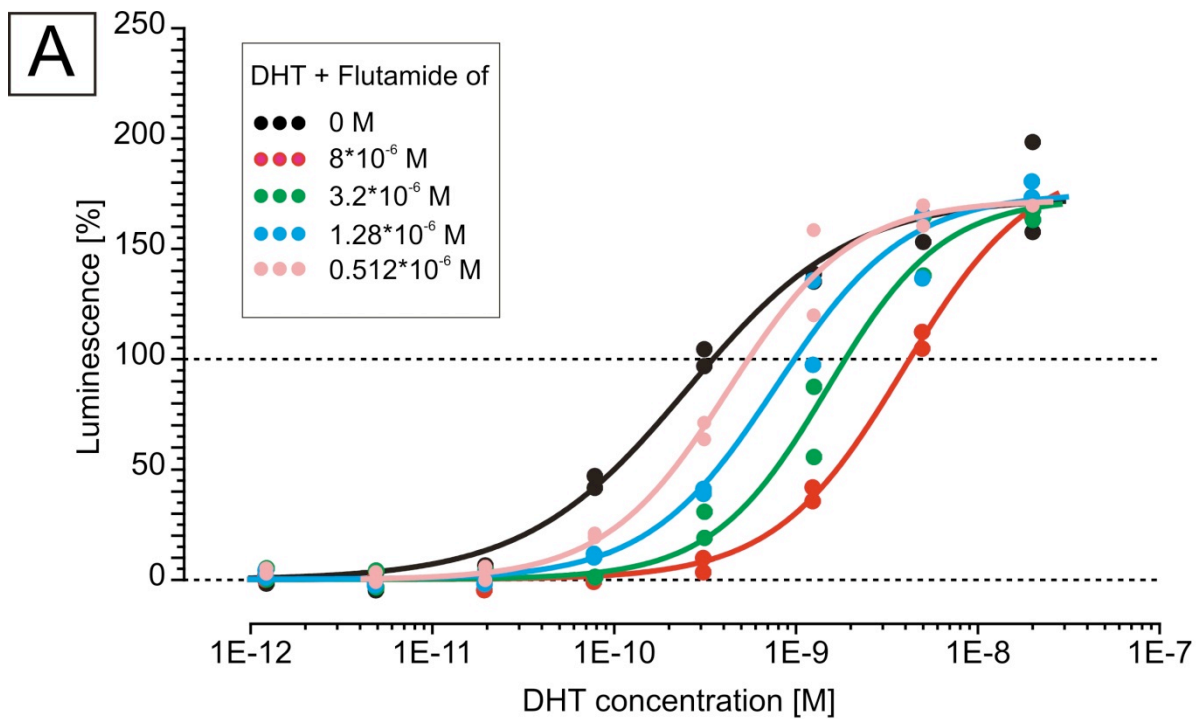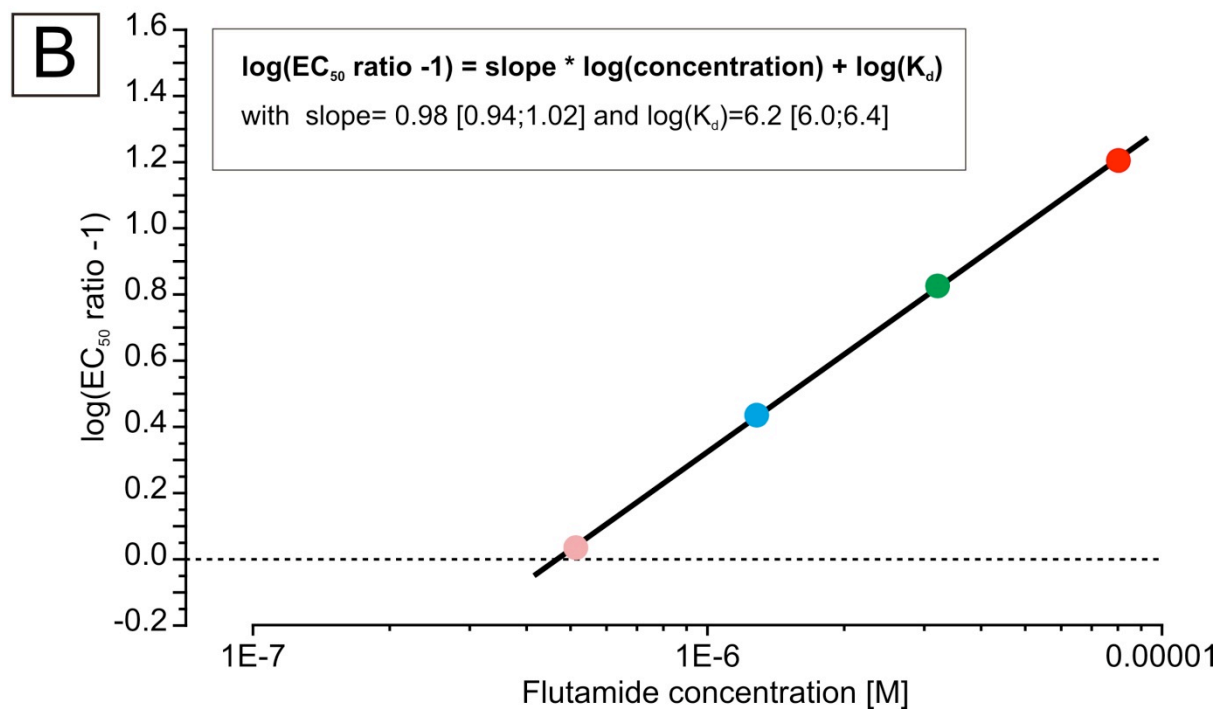

*Supplemental Material, Figure S1: Concentration-response curves for DHT in the presence of fixed flutamide concentrations (A) and corresponding Schild regression plot (B).*

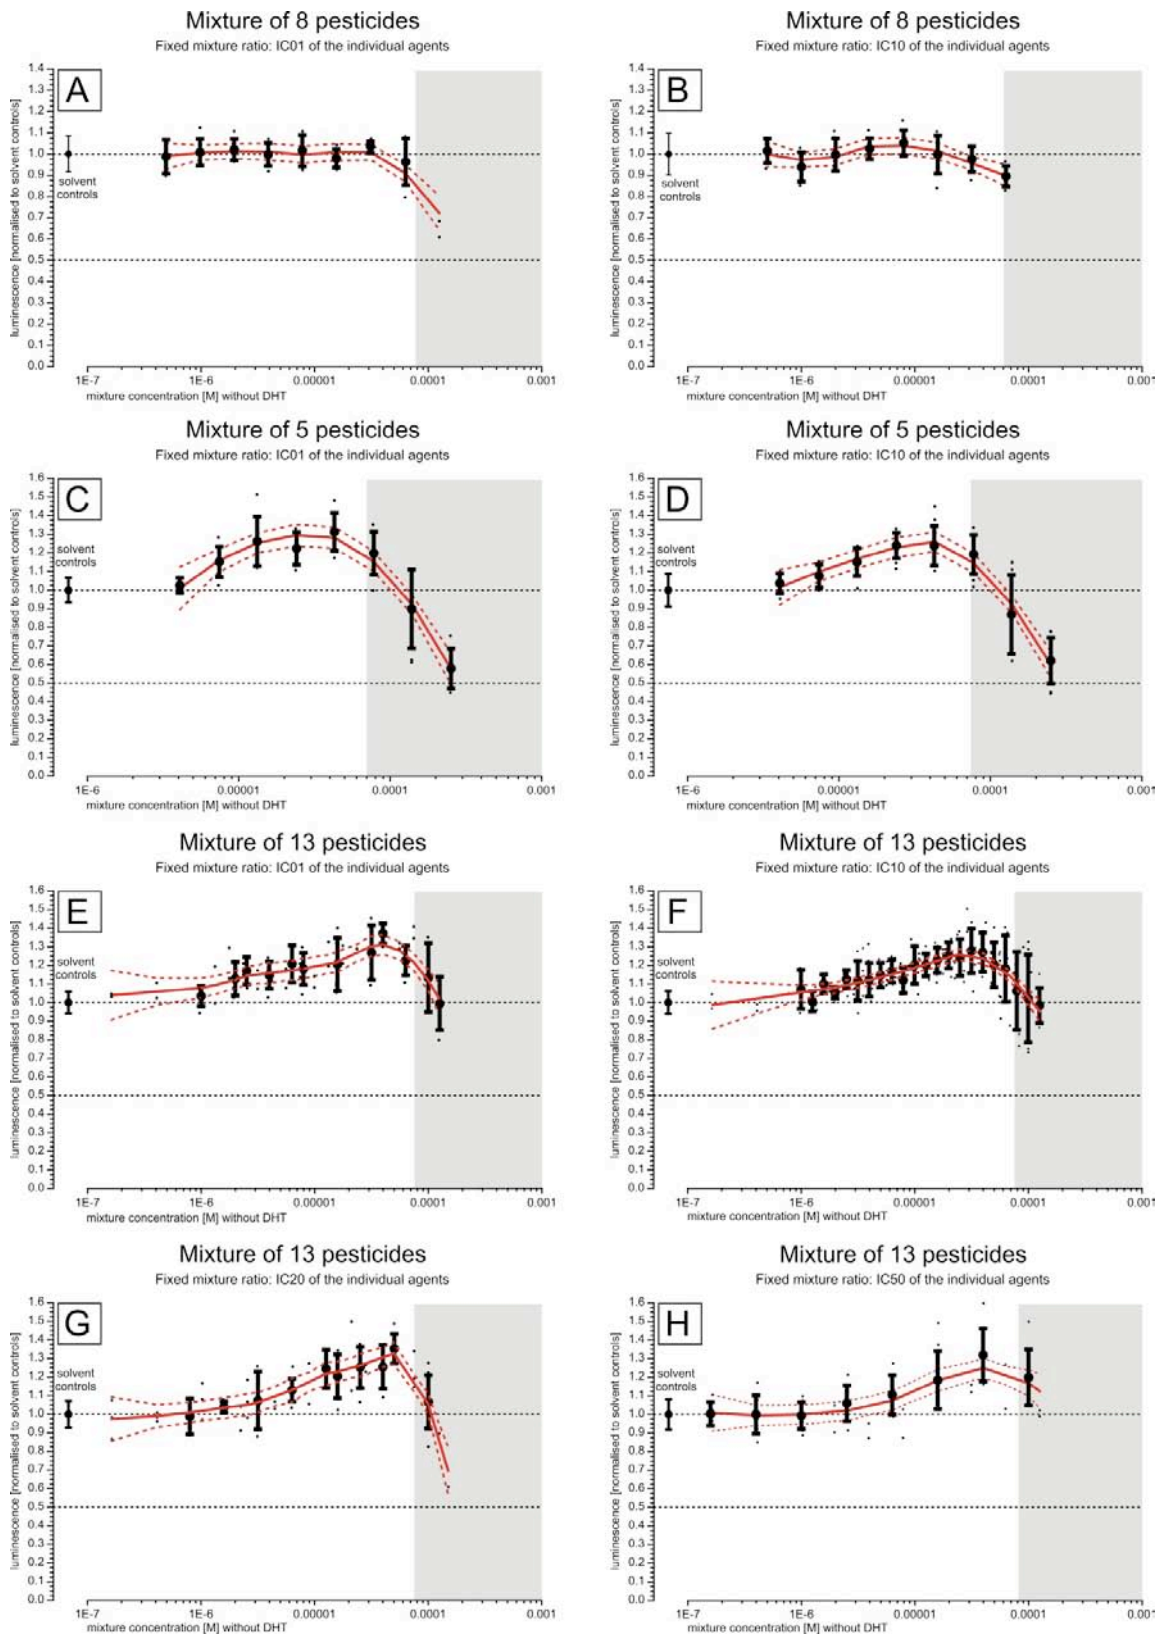

**Supplemental Material, Figure S2: Tested mixtures without DHT - Observed luminescence of mixtures with 8 pesticides composed in the ratio of their individual IC01 values (A) and IC10 values (B), with 5 pesticides mixed in the ratio of their individual IC01 values (C) and IC10 values (D), and with 13 pesticides mixed in the ratio of their individual IC01 values (E), IC10 values (F), IC20 values (G) and IC50 values (H). Observed effects are from at least three independent mixture experiments and shown as mean  $\pm$  standard deviation, non-parametric regression fit of the observed effects is shown as red line, with the dotted red line indicating the corresponding 95% confidence belt. Cytotoxicity is highlighted as grey area (see Material & Methods for more details).**
